# Supplementary material
Source: PubMed Central journal article supplement (PMC3789374)
Supplement: NIHMS505908-supplement-Supplementary_Tables_S1_to_S4.pdf [file NIHMS505908-supplement-Supplementary_Tables_S1_to_S4.pdf]

**Table S1** Operational taxonomic units (OTUs) over-represented in mucosa after adjusting for multiple comparisons ( $P < 0.0022$ )

| OTU name | OTU taxonomic assignment                 | Mean (saliva) | Variance (saliva) | SE (saliva) | Mean (mucosa) | Variance (mucosa) | SE (mucosa) | P-value |
|----------|------------------------------------------|---------------|-------------------|-------------|---------------|-------------------|-------------|---------|
| 20       | Streptococcus mitis   Oral Taxon 677     | 383.5         | 94020.3           | 153.3       | 2265.0        | 652644.0          | 305.3       | 0.00000 |
| 3        | Haemophilus sp.   Oral Taxon 035         | 104.0         | 25848.6           | 80.3        | 204.5         | 59620.3           | 92.2        | 0.00000 |
| 120      | Gemella haemolysans   Oral Taxon 626     | 36.0          | 1329.3            | 18.2        | 192.8         | 56825.8           | 90.0        | 0.00000 |
| 6        | Haemophilus sp.   Oral Taxon 036         | 19.0          | 800.6             | 14.1        | 159.8         | 35743.4           | 71.4        | 0.00000 |
| 31       | Streptococcus peroris   Oral Taxon 728   | 53.5          | 1211.6            | 17.4        | 105.7         | 9297.2            | 36.4        | 0.00000 |
| 40       | Prevotella sp.   Oral Taxon 473          | 13.5          | 225.6             | 7.5         | 100.2         | 25323.5           | 60.1        | 0.00000 |
| 33       | Granulicatella elegans   Oral Taxon 596  | 20.5          | 425.0             | 10.3        | 70.0          | 6926.0            | 31.4        | 0.00000 |
| 107      | Streptococcus oralis   Oral Taxon 707    | 4.2           | 61.5              | 3.9         | 10.7          | 295.9             | 6.5         | 0.00029 |
| 133      | Streptococcus gordonii   Oral Taxon 622  | 0.2           | 0.2               | 0.2         | 8.8           | 290.1             | 6.4         | 0.00000 |
| 82       | Haemophilus aegyptius   Oral Taxon 535   | 1.2           | 6.2               | 1.2         | 6.7           | 315.5             | 6.7         | 0.00001 |
| 168      | Streptococcus sanguinis   Oral Taxon 758 | 0.2           | 0.2               | 0.2         | 5.7           | 215.5             | 5.5         | 0.00000 |
| 112      | Streptococcus cristatus   Oral Taxon 578 | 0.2           | 0.2               | 0.2         | 2.7           | 51.5              | 2.7         | 0.00197 |
| 148      | Streptococcus mitis   Oral Taxon 677     | 0.0           | 0.0               | 0.0         | 2.7           | 26.2              | 1.9         | 0.00037 |

Data represent METASTATS output. SE, standard error.

**Table S2** Operational taxonomic units (OTUs) over-represented in saliva after adjusting for multiple comparisons ( $P < 0.0022$ )

| OTU name | OTU taxonomic assignment                    | Mean (saliva) | Variance (saliva) | SE (saliva) | Mean (mucosa) | Variance (mucosa) | SE (mucosa) | P-value |
|----------|---------------------------------------------|---------------|-------------------|-------------|---------------|-------------------|-------------|---------|
| 7        | Neisseria flavescens   Oral Taxon 610       | 755.0         | 114879.3          | 169.4       | 158.2         | 111181.9          | 126.0       | 0.00000 |
| 1        | Haemophilus parainfluenzae   Oral Taxon 718 | 510.5         | 4729.6            | 34.3        | 349.4         | 92701.9           | 115.0       | 0.00000 |
| 36       | Porphyromonas sp.   Oral Taxon 279          | 426.2         | 232854.9          | 241.2       | 59.1          | 6933.1            | 31.4        | 0.00000 |
| 260      | Prevotella melaninogenica   Oral Taxon 469  | 165.2         | 37132.9           | 96.3        | 4.1           | 30.4              | 2.0         | 0.00000 |

|     |                                                        |       |         |       |      |        |      |         |
|-----|--------------------------------------------------------|-------|---------|-------|------|--------|------|---------|
| 132 | Fusobacterium periodonticum   Oral Taxon 201           | 159.5 | 1311.0  | 18.1  | 22.4 | 648.9  | 9.6  | 0.00000 |
| 39  | Unclassified Prevotella sp.                            | 127.2 | 42238.9 | 102.7 | 8.7  | 249.2  | 5.9  | 0.00000 |
| 32  | Granulicatella adiacens [paradiacens]   Oral Taxon 534 | 124.2 | 304.9   | 8.7   | 53.1 | 5375.4 | 27.7 | 0.00000 |
| 109 | Veillonella parvula   Oral Taxon 161                   | 121.2 | 1126.9  | 16.7  | 48.0 | 4347.6 | 24.9 | 0.00000 |
| 110 | Streptococcus sp.   Oral Taxon 431                     | 80.2  | 522.9   | 11.4  | 40.0 | 1956.0 | 16.7 | 0.00000 |
| 126 | Rothia mucilaginoso   Oral Taxon 681                   | 76.5  | 2007.0  | 22.3  | 38.1 | 2780.8 | 19.9 | 0.00000 |
| 41  | Prevotella sp.   Oral Taxon 474                        | 67.0  | 5640.0  | 37.5  | 6.7  | 181.5  | 5.0  | 0.00000 |
| 9   | Neisseria sicca   Oral Taxon 764                       | 64.5  | 3659.6  | 30.2  | 28.4 | 1294.2 | 13.5 | 0.00000 |
| 114 | Streptococcus sp.   Oral Taxon 065                     | 47.7  | 608.9   | 12.3  | 13.5 | 127.9  | 4.2  | 0.00000 |
| 34  | Rothia sp.   Oral Taxon 188                            | 43.2  | 1909.5  | 21.8  | 25.2 | 1216.5 | 13.1 | 0.00000 |
| 5   | Unclassified Aggregatibacter sp.                       | 41.5  | 1772.3  | 21.0  | 11.0 | 252.6  | 6.0  | 0.00000 |
| 287 | Prevotella pallens   Oral Taxon 714                    | 37.0  | 1026.0  | 16.0  | 0.4  | 0.6    | 0.2  | 0.00000 |
| 146 | Streptococcus sp.   Oral Taxon 061                     | 29.0  | 216.6   | 7.3   | 12.2 | 220.5  | 5.6  | 0.00000 |
| 288 | Prevotella sp.   Oral Taxon 308                        | 28.7  | 1175.5  | 17.1  | 0.0  | 0.0    | 0.0  | 0.00000 |
| 2   | Aggregatibacter segnis   Oral Taxon 762                | 28.0  | 171.3   | 6.5   | 8.0  | 67.0   | 3.0  | 0.00000 |
| 8   | Lautropia mirabilis   Oral Taxon 022                   | 26.7  | 289.5   | 8.5   | 14.0 | 367.6  | 7.2  | 0.00000 |
| 13  | Campylobacter concisus   Oral Taxon 575                | 24.5  | 635.6   | 12.6  | 1.7  | 2.5    | 0.6  | 0.00000 |
| 338 | Prevotella histicola   Oral Taxon 298                  | 24.2  | 768.9   | 13.8  | 0.0  | 0.0    | 0.0  | 0.00000 |
| 135 | Porphyromonas sp.   Oral Taxon 284                     | 23.0  | 290.0   | 8.5   | 6.7  | 96.5   | 3.7  | 0.00000 |
| 121 | Actinomyces sp.   Oral Taxon 180                       | 22.5  | 317.6   | 8.9   | 1.1  | 3.4    | 0.7  | 0.00000 |
| 447 | TM7 [G-1] sp.   Oral Taxon 352                         | 21.5  | 869.6   | 14.7  | 1.5  | 8.2    | 1.0  | 0.00000 |
| 274 | Prevotella tannerae   Oral Taxon 466                   | 20.2  | 1160.9  | 17.0  | 2.0  | 9.0    | 1.1  | 0.00000 |
| 42  | Prevotella sp.   Oral Taxon 299                        | 19.5  | 159.0   | 6.3   | 2.4  | 5.2    | 0.8  | 0.00000 |
| 153 | Oribacterium sinus   Oral Taxon 457                    | 17.5  | 123.0   | 5.5   | 2.1  | 8.4    | 1.1  | 0.00000 |
| 53  | Neisseria flava   Oral Taxon 609                       | 17.2  | 354.9   | 9.4   | 8.1  | 134.4  | 4.3  | 0.00000 |
| 124 | Gemella sanguinis   Oral Taxon 757                     | 17.2  | 100.2   | 5.0   | 5.5  | 40.9   | 2.4  | 0.00000 |
| 15  | Neisseria elongata   Oral Taxon 598                    | 16.7  | 355.5   | 9.4   | 7.5  | 275.2  | 6.2  | 0.00001 |
| 151 | Streptococcus parasanguinis II                         | 16.5  | 95.0    | 4.8   | 5.5  | 84.2   | 3.4  | 0.00000 |

|     |                                                       |      |       |     |     |       |     |         |
|-----|-------------------------------------------------------|------|-------|-----|-----|-------|-----|---------|
|     | Oral Taxon 411                                        |      |       |     |     |       |     |         |
| 334 | Prevotella salivae  <br>Oral Taxon 307                | 15.5 | 355.6 | 9.4 | 0.2 | 0.5   | 0.2 | 0.00000 |
| 139 | Prevotella shahii  <br>Oral Taxon 795                 | 15.0 | 248.6 | 7.8 | 4.8 | 165.1 | 4.8 | 0.00000 |
| 154 | Oribacterium sp.  <br>Oral Taxon 108                  | 12.2 | 68.2  | 4.1 | 0.4 | 1.2   | 0.4 | 0.00000 |
| 141 | Leptotrichia sp.  <br>Oral Taxon 215                  | 11.5 | 52.3  | 3.6 | 2.4 | 4.9   | 0.8 | 0.00000 |
| 326 | Prevotella melaninogenica  <br>Oral Taxon 469         | 10.7 | 356.2 | 9.4 | 0.1 | 0.1   | 0.1 | 0.00000 |
| 336 | Prevotella sp.  <br>Oral Taxon 302                    | 10.0 | 246.0 | 7.8 | 0.4 | 0.6   | 0.2 | 0.00000 |
| 125 | Corynebacterium durum  <br>Oral Taxon 595             | 9.7  | 86.9  | 4.6 | 4.0 | 26.0  | 1.9 | 0.00031 |
| 37  | Capnocytophaga sp.  <br>Oral Taxon 329                | 9.5  | 268.3 | 8.1 | 3.8 | 87.1  | 3.5 | 0.00039 |
| 18  | Aggregatibacter<br>paraphrophilus   Oral Taxon<br>720 | 9.0  | 238.6 | 7.7 | 1.0 | 2.0   | 0.5 | 0.00000 |
| 305 | Capnocytophaga sputigena  <br>Oral Taxon 775          | 8.2  | 98.2  | 4.9 | 3.4 | 60.6  | 2.9 | 0.00129 |
| 275 | Leptotrichia sp.  <br>Oral Taxon 417                  | 8.0  | 148.6 | 6.0 | 3.2 | 45.5  | 2.5 | 0.00110 |
| 14  | Campylobacter showae  <br>Oral Taxon 763              | 7.7  | 19.5  | 2.2 | 2.2 | 22.9  | 1.8 | 0.00004 |
| 184 | Solobacterium moorei  <br>Oral Taxon 678              | 6.7  | 15.5  | 1.9 | 0.2 | 0.2   | 0.1 | 0.00000 |
| 190 | Megasphaera micronuciformis<br> <br>Oral Taxon 122    | 5.7  | 21.5  | 2.3 | 0.1 | 0.1   | 0.1 | 0.00000 |
| 195 | Unclassified Actinomyces sp.                          | 5.5  | 107.0 | 5.1 | 0.8 | 5.1   | 0.8 | 0.00000 |
| 78  | Unclassified Haemophilus sp.                          | 5.2  | 110.2 | 5.2 | 0.1 | 0.1   | 0.1 | 0.00000 |
| 409 | Eubacterium [11][G-1] sulci  <br>Oral Taxon 467       | 5.0  | 13.3  | 1.8 | 0.0 | 0.0   | 0.0 | 0.00000 |
| 262 | Clostridiales [F-2][G-1] sp.  <br>Oral Taxon 075      | 4.7  | 23.5  | 2.4 | 0.4 | 0.6   | 0.2 | 0.00000 |
| 19  | Campylobacter sp.  <br>Oral Taxon 044                 | 4.5  | 51.0  | 3.5 | 0.2 | 0.5   | 0.2 | 0.00000 |
| 446 | TM7 [G-3] sp.  <br>Oral Taxon 351                     | 4.0  | 24.0  | 2.4 | 1.0 | 5.0   | 0.8 | 0.00167 |
| 375 | Leptotrichia sp.  <br>Oral Taxon 221                  | 3.7  | 56.2  | 3.7 | 0.4 | 1.2   | 0.4 | 0.00006 |
| 263 | Clostridiales [F-2][G-2] sp.  <br>Oral Taxon 085      | 3.5  | 22.3  | 2.3 | 0.1 | 0.1   | 0.1 | 0.00000 |
| 98  | Unclassified Neisseriaceae                            | 3.2  | 42.2  | 3.2 | 0.0 | 0.0   | 0.0 | 0.00000 |
| 44  | Atopobium parvulum  <br>Oral Taxon 723                | 3.0  | 18.0  | 2.1 | 0.2 | 0.5   | 0.2 | 0.00021 |
| 417 | Mogibacterium diversum  <br>Oral Taxon 593            | 3.0  | 12.0  | 1.7 | 0.0 | 0.0   | 0.0 | 0.00000 |
| 279 | Unclassified SR1 [G-1] sp.                            | 2.5  | 19.0  | 2.1 | 0.1 | 0.1   | 0.1 | 0.00029 |
| 286 | Prevotella oris  <br>Oral Taxon 311                   | 2.5  | 9.6   | 1.5 | 0.2 | 0.5   | 0.2 | 0.00119 |

|     |                                                       |     |      |     |     |     |     |         |
|-----|-------------------------------------------------------|-----|------|-----|-----|-----|-----|---------|
| 337 | Unclassified Bacteroidetes                            | 2.5 | 9.0  | 1.5 | 0.0 | 0.0 | 0.0 | 0.00004 |
| 350 | Prevotella sp.   Oral Taxon 299                       | 2.2 | 20.2 | 2.2 | 0.0 | 0.0 | 0.0 | 0.00011 |
| 276 | Lachnospiraceae [G-1] sp.   Oral Taxon 107            | 2.0 | 3.3  | 0.9 | 0.1 | 0.1 | 0.1 | 0.00186 |
| 342 | Prevotella sp.   Oral Taxon 306                       | 2.0 | 11.3 | 1.6 | 0.0 | 0.0 | 0.0 | 0.00030 |
| 328 | Prevotella sp.   Oral Taxon 305                       | 1.7 | 12.2 | 1.7 | 0.0 | 0.0 | 0.0 | 0.00084 |
| 395 | Atopobium parvulum   Oral Taxon 723                   | 1.7 | 1.5  | 0.6 | 0.0 | 0.0 | 0.0 | 0.00084 |
| 371 | Fusobacterium nucleatum ss vincentii   Oral Taxon 200 | 1.5 | 3.6  | 0.9 | 0.0 | 0.0 | 0.0 | 0.00231 |

Data represent METASTATS output.

**Table S3** Genera over-represented in mucosa after adjusting for multiple comparisons

( $P < 0.0128$ )

| Taxonomy             | Mean (saliva) | Variance (saliva) | SE (saliva) | Mean (mucosa) | Variance (mucosa) | SE (mucosa) | P-value |
|----------------------|---------------|-------------------|-------------|---------------|-------------------|-------------|---------|
| <i>Streptococcus</i> | 656.2         | 92214.9           | 151.8       | 2533.7        | 710442.5          | 318.5       | 0.00000 |
| <i>Gemella</i>       | 41.7          | 727.5             | 13.4        | 210.4         | 66432.6           | 97.4        | 0.00000 |

Data represent METASTATS output. SE, standard error.

**Table S4** Genera over-represented in saliva after adjusting for multiple comparisons

( $P < 0.0128$ )

| Taxonomy              | Mean (saliva) | Variance (saliva) | SE (saliva) | Mean (mucosa) | Variance (mucosa) | SE (mucosa) | P-value |
|-----------------------|---------------|-------------------|-------------|---------------|-------------------|-------------|---------|
| <i>Haemophilus</i>    | 404.0         | 25360.6           | 79.6        | 323.5         | 95805.2           | 116.9       | 0.00000 |
| <i>Neisseria</i>      | 840.7         | 92084.2           | 151.7       | 206.4         | 164046.6          | 153.0       | 0.00000 |
| <i>Porphyromonas</i>  | 473.5         | 276195.0          | 262.7       | 70.7          | 9500.9            | 36.8        | 0.00000 |
| <i>Fusobacterium</i>  | 178.2         | 2546.2            | 25.2        | 27.2          | 1085.5            | 12.4        | 0.00000 |
| <i>Granulicatella</i> | 147.0         | 1202.6            | 17.3        | 124.1         | 7134.1            | 31.9        | 0.00146 |
| <i>Rothia</i>         | 129.0         | 3414.0            | 29.2        | 60.5          | 4959.2            | 26.6        | 0.00000 |
| <i>Actinobacillus</i> | 40.0          | 2214.0            | 23.5        | 8.9           | 122.1             | 4.1         | 0.00000 |
| <i>Veillonella</i>    | 128.7         | 1172.9            | 17.1        | 56.0          | 7206.3            | 32.0        | 0.00000 |
| <i>Prevotella</i>     | 332.7         | 100501.5          | 158.5       | 21.1          | 529.8             | 8.6         | 0.00000 |

|                           |      |        |      |     |       |     |         |
|---------------------------|------|--------|------|-----|-------|-----|---------|
| <i>Actinomyces</i>        | 41.0 | 1048.6 | 16.1 | 6.0 | 56.6  | 2.8 | 0.00000 |
| <i>Campylobacter</i>      | 35.2 | 444.9  | 10.5 | 3.5 | 32.9  | 2.1 | 0.00000 |
| <i>Abiotrophia</i>        | 3.2  | 16.2   | 2.0  | 0.8 | 2.1   | 0.5 | 0.00675 |
| <i>Capnocytophaga</i>     | 28.0 | 1454.0 | 19.0 | 9.8 | 452.8 | 8.0 | 0.00000 |
| <i>Corynebacterium</i>    | 9.5  | 33.6   | 2.9  | 2.8 | 39.4  | 2.3 | 0.00000 |
| <i>Oribacterium</i>       | 27.2 | 379.5  | 9.7  | 2.8 | 25.4  | 1.9 | 0.00000 |
| <i>Aggregatibacter</i>    | 14.7 | 537.5  | 11.5 | 1.2 | 3.9   | 0.7 | 0.00000 |
| <i>Leptotrichia</i>       | 18.7 | 312.9  | 8.8  | 6.4 | 69.6  | 3.1 | 0.00000 |
| <i>Eubacterium</i>        | 5.7  | 22.9   | 2.3  | 0.2 | 0.5   | 0.2 | 0.00000 |
| <i>Atopobium</i>          | 5.7  | 26.2   | 2.5  | 0.2 | 0.5   | 0.2 | 0.00000 |
| <i>Solobacterium</i>      | 3.7  | 6.9    | 1.3  | 0.5 | 2.2   | 0.5 | 0.00019 |
| <i>Megasphaera</i>        | 2.5  | 3.6    | 0.9  | 0   | 0     | 0   | 0.00004 |
| <i>Treponema</i>          | 6.2  | 84.9   | 4.6  | 1.8 | 13.1  | 1.3 | 0.00028 |
| <i>Moryella</i>           | 3.0  | 12.0   | 1.7  | 0.4 | 0.6   | 0.2 | 0.00072 |
| <i>Mogibacterium</i>      | 4.5  | 21.6   | 2.3  | 0   | 0     | 0   | 0.00000 |
| <i>Peptostreptococcus</i> | 1.7  | 8.2    | 1.4  | 0.1 | 0.1   | 0.1 | 0.00458 |
| <i>Selenomonas</i>        | 2    | 0.6    | 0.4  | 0.2 | 0.5   | 0.3 | 0.00631 |

Data represent METASTATS output. SE, standard error.
